# Supplementary material for: A novel satiety sensor detects circulating glucose and suppresses food consumption via insulin-producing cells in Drosophila
Source: PubMed Central journal article supplement (PMC8089096; doi:10.1038/s41422-020-00449-7), 2020-12-03
Supplement: 41422_2020_449_MOESM1_ESM.pdf [file 41422_2020_449_MOESM1_ESM.pdf]

Fig S1

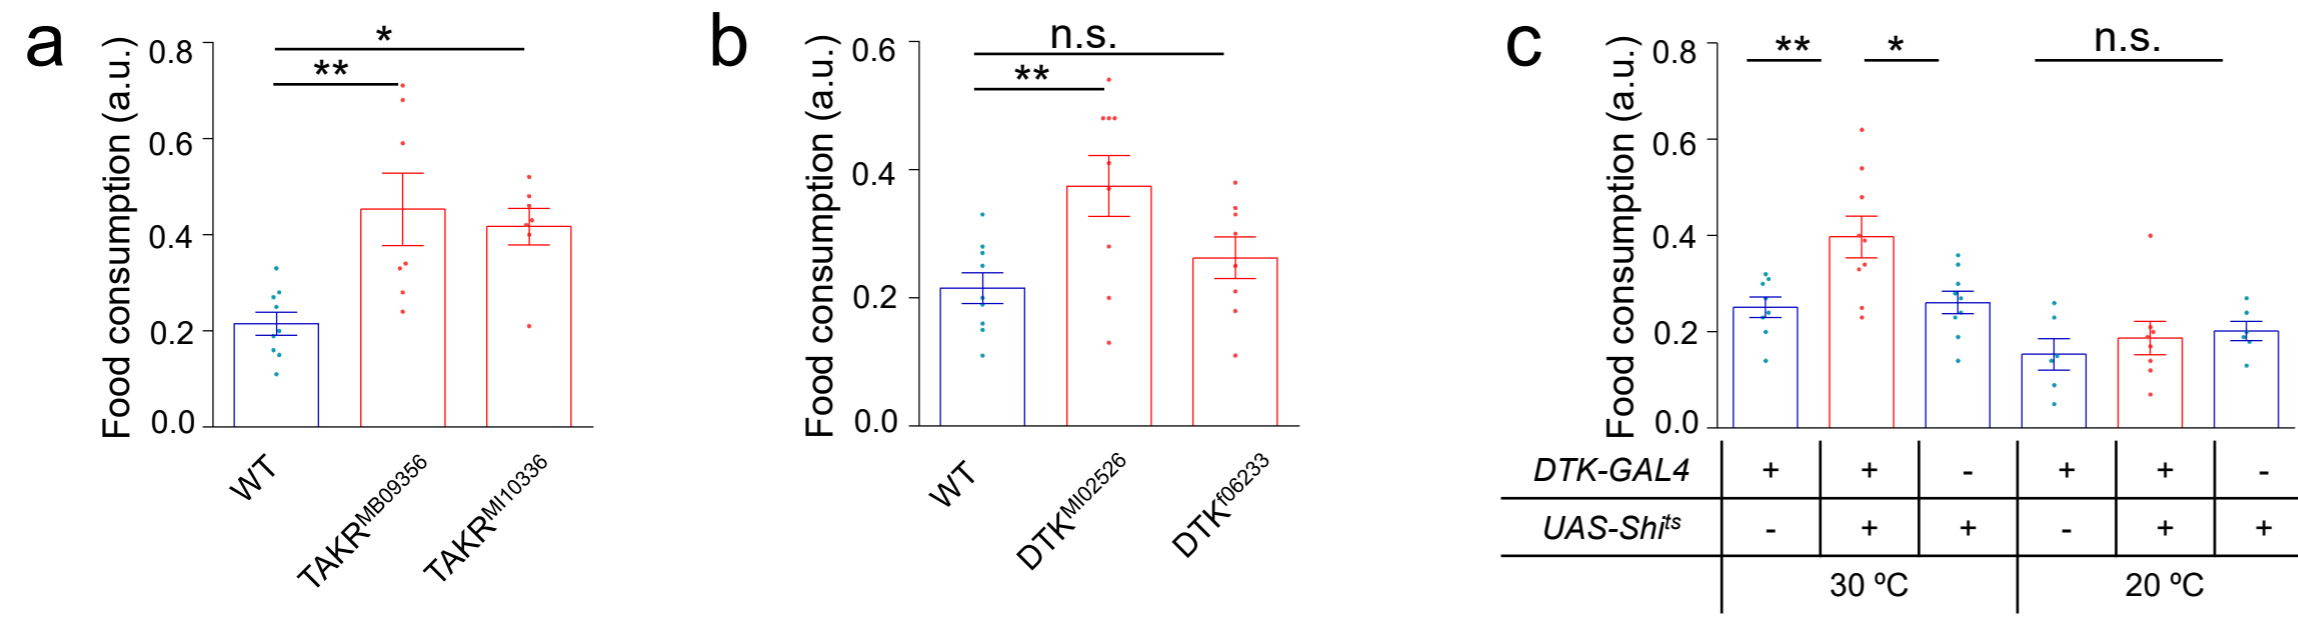

**Fig. S1 DTK-TAKR99D signaling suppresses D-glucose consumption. a-c** Relative D-glucose consumption of flies of the indicated genotypes assayed in groups of 10 flies ( $n = 7-9$ ).
