# Supplementary material for: A novel satiety sensor detects circulating glucose and suppresses food consumption via insulin-producing cells in Drosophila
Source: PubMed Central journal article supplement (PMC8089096; doi:10.1038/s41422-020-00449-7), 2020-12-03
Supplement: 41422_2020_449_MOESM2_ESM.pdf [file 41422_2020_449_MOESM2_ESM.pdf]

Fig S2

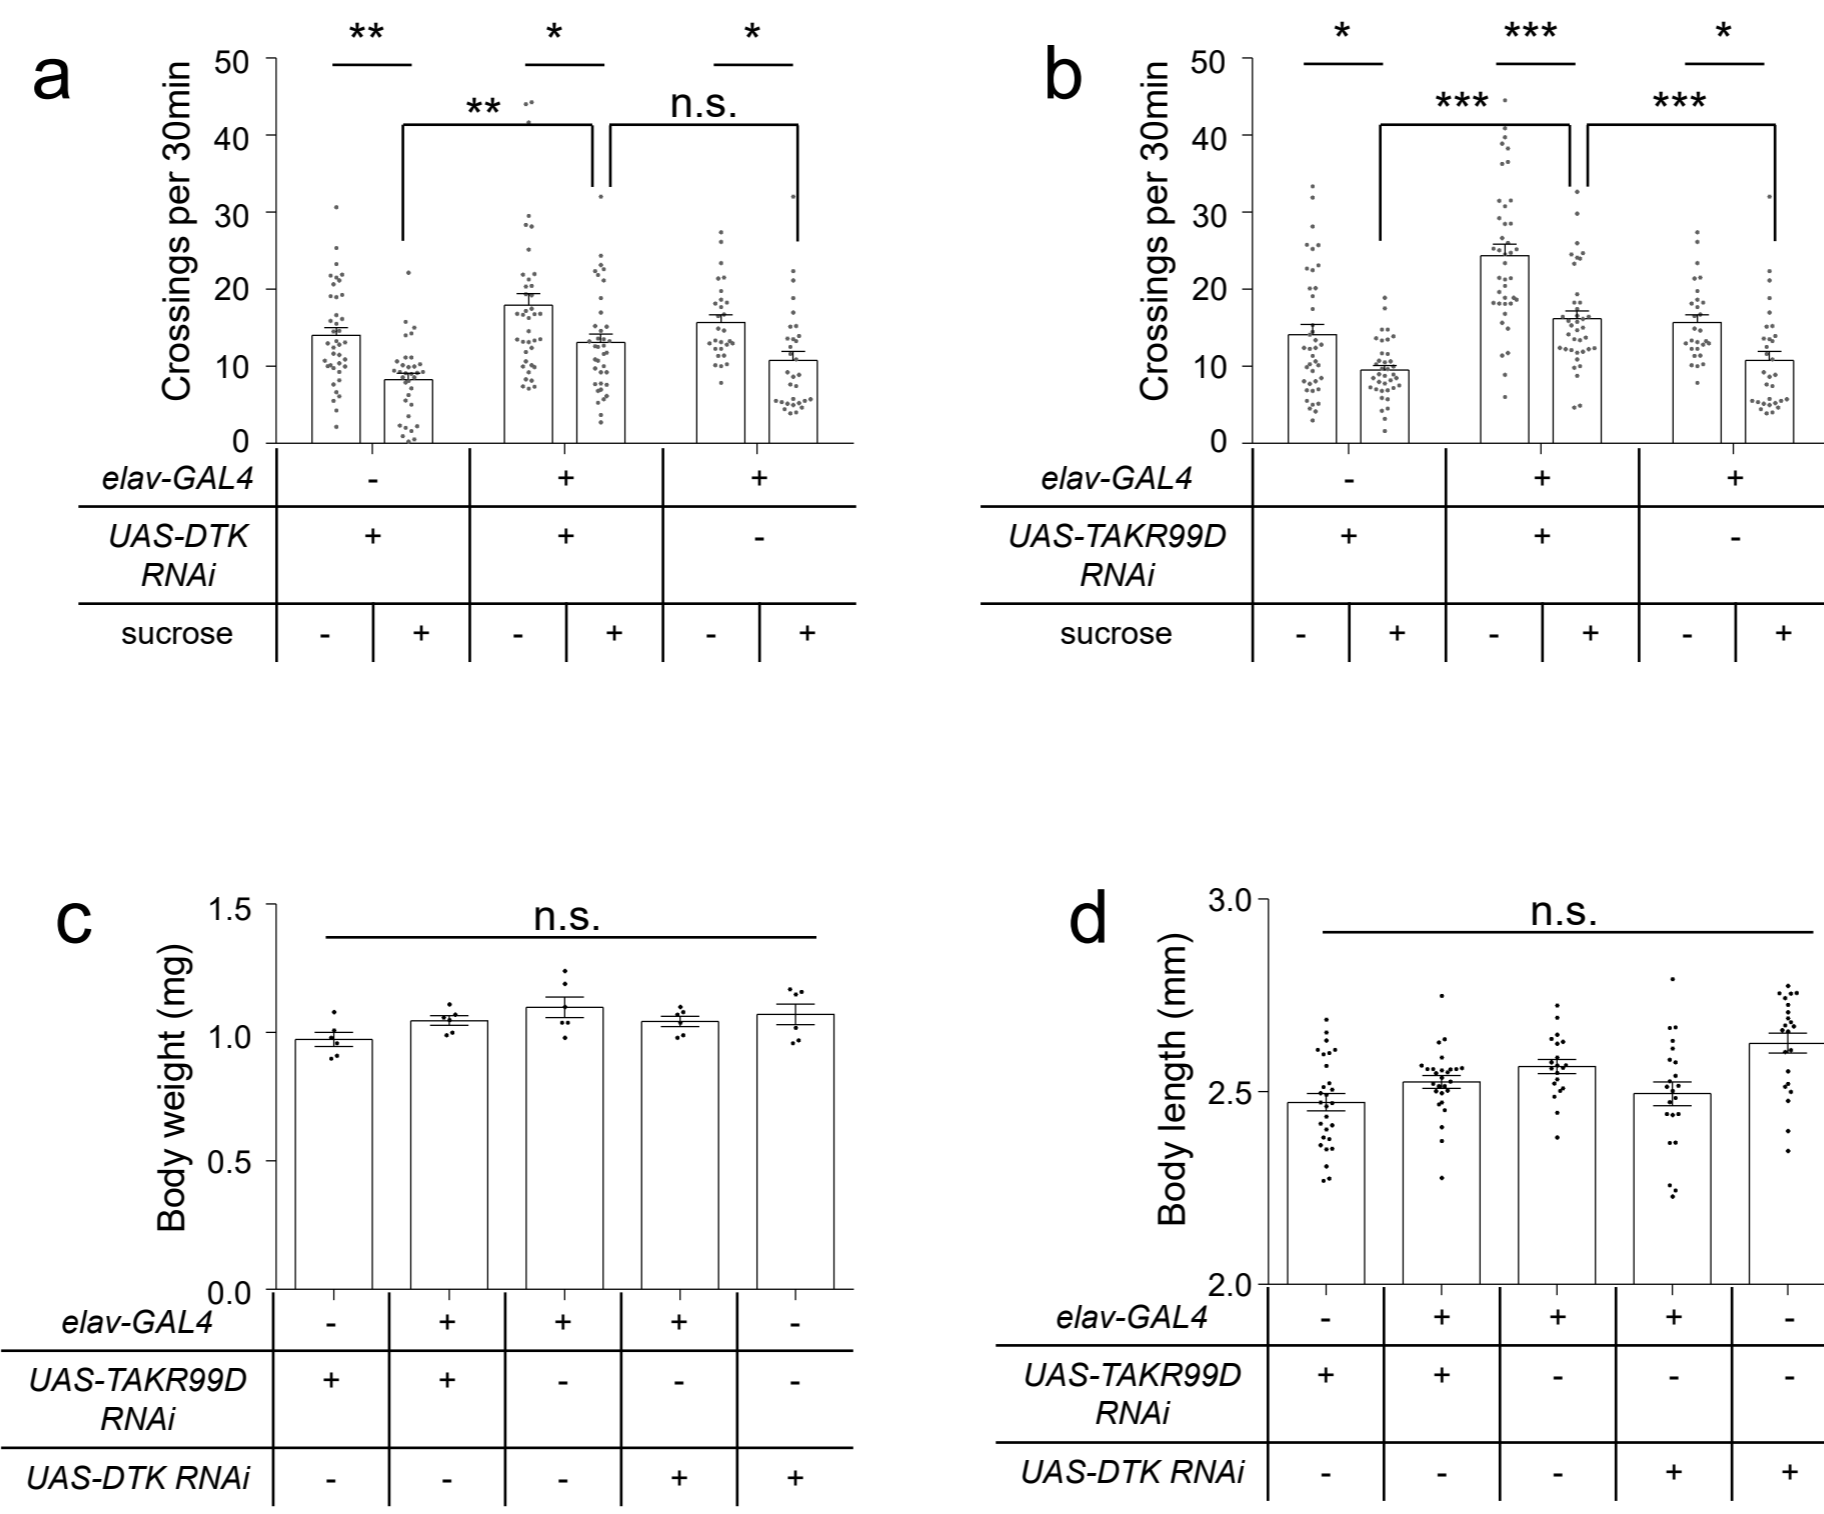

**Fig. S2 Disrupting DTK-TAKR99D signaling does not affect starvation-induced food-seeking behavior, body weight, or body size. a, b** Average midline crossing activity of flies with pan-neuronal RNAi knockdown of DTK (**a**) or TAKR99D (**b**) ( $n = 31-40$ ). **c, d** The body weight (**c**,  $n = 60$ ) and the length (**d**,  $n = 20-28$ ) of the indicated genotypes. Error bars represent SEM. ns,  $P > 0.05$ ;  $*P < 0.05$ ;  $**P < 0.01$ ;  $***P < 0.001$ .
