# Supplementary material for: A novel satiety sensor detects circulating glucose and suppresses food consumption via insulin-producing cells in Drosophila
Source: PubMed Central journal article supplement (PMC8089096; doi:10.1038/s41422-020-00449-7), 2020-12-03
Supplement: 41422_2020_449_MOESM3_ESM.pdf [file 41422_2020_449_MOESM3_ESM.pdf]

Fig S3

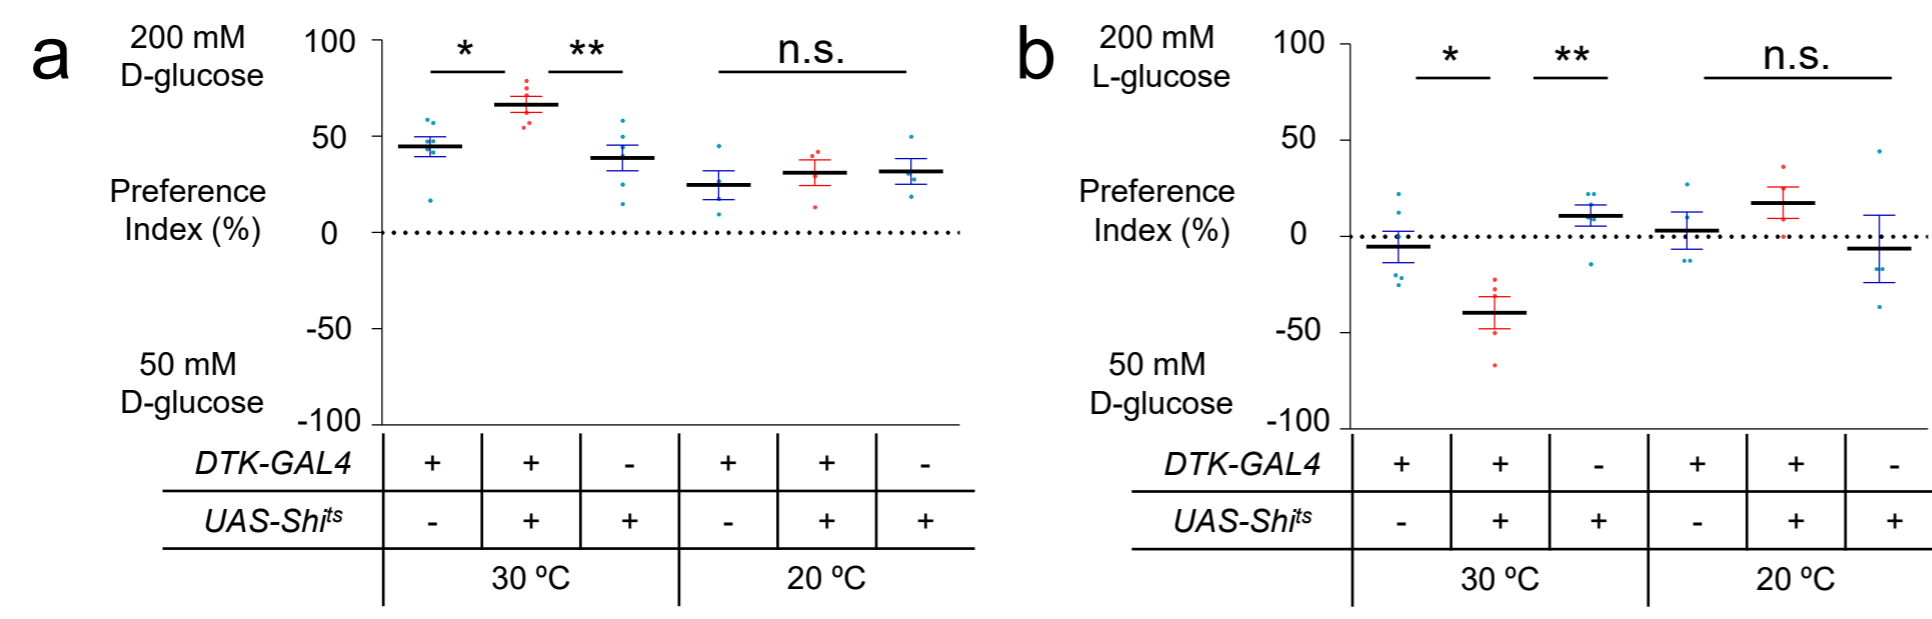

**Fig. S3 Disrupting DTK-TAKR99D signaling increases feeding preference towards nutritive sugars. a, b** Feeding preference between two indicated food choices of flies of the indicated genotypes assayed in groups of 25 ( $n = 4-6$ ).
