# Supplementary material for: A novel satiety sensor detects circulating glucose and suppresses food consumption via insulin-producing cells in Drosophila
Source: PubMed Central journal article supplement (PMC8089096; doi:10.1038/s41422-020-00449-7), 2020-12-03
Supplement: 41422_2020_449_MOESM4_ESM.pdf [file 41422_2020_449_MOESM4_ESM.pdf]

Fig S4

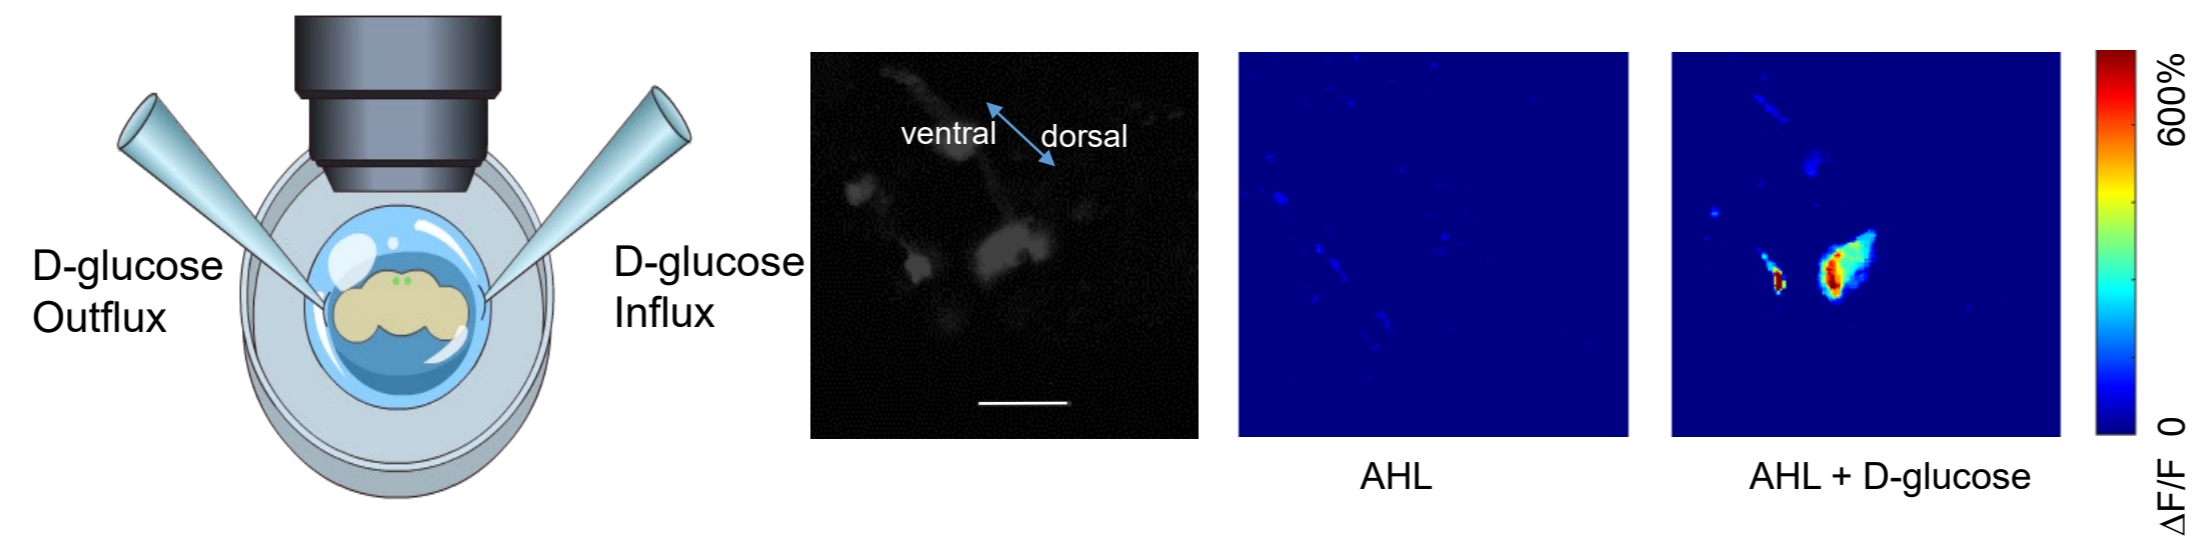

**Fig. S4 DTK<sup>+</sup> neurons can be activated by D-glucose.** In the *ex vivo* calcium imaging preparations (left), the perfusion of 80 mM D-glucose elicited robust calcium responses in DTK<sup>+</sup> neurons in the SMP cluster. Scale bar, 10  $\mu$ m.
