# Supplementary material for: A novel satiety sensor detects circulating glucose and suppresses food consumption via insulin-producing cells in Drosophila
Source: PubMed Central journal article supplement (PMC8089096; doi:10.1038/s41422-020-00449-7), 2020-12-03
Supplement: 41422_2020_449_MOESM5_ESM.pdf [file 41422_2020_449_MOESM5_ESM.pdf]

Fig S5

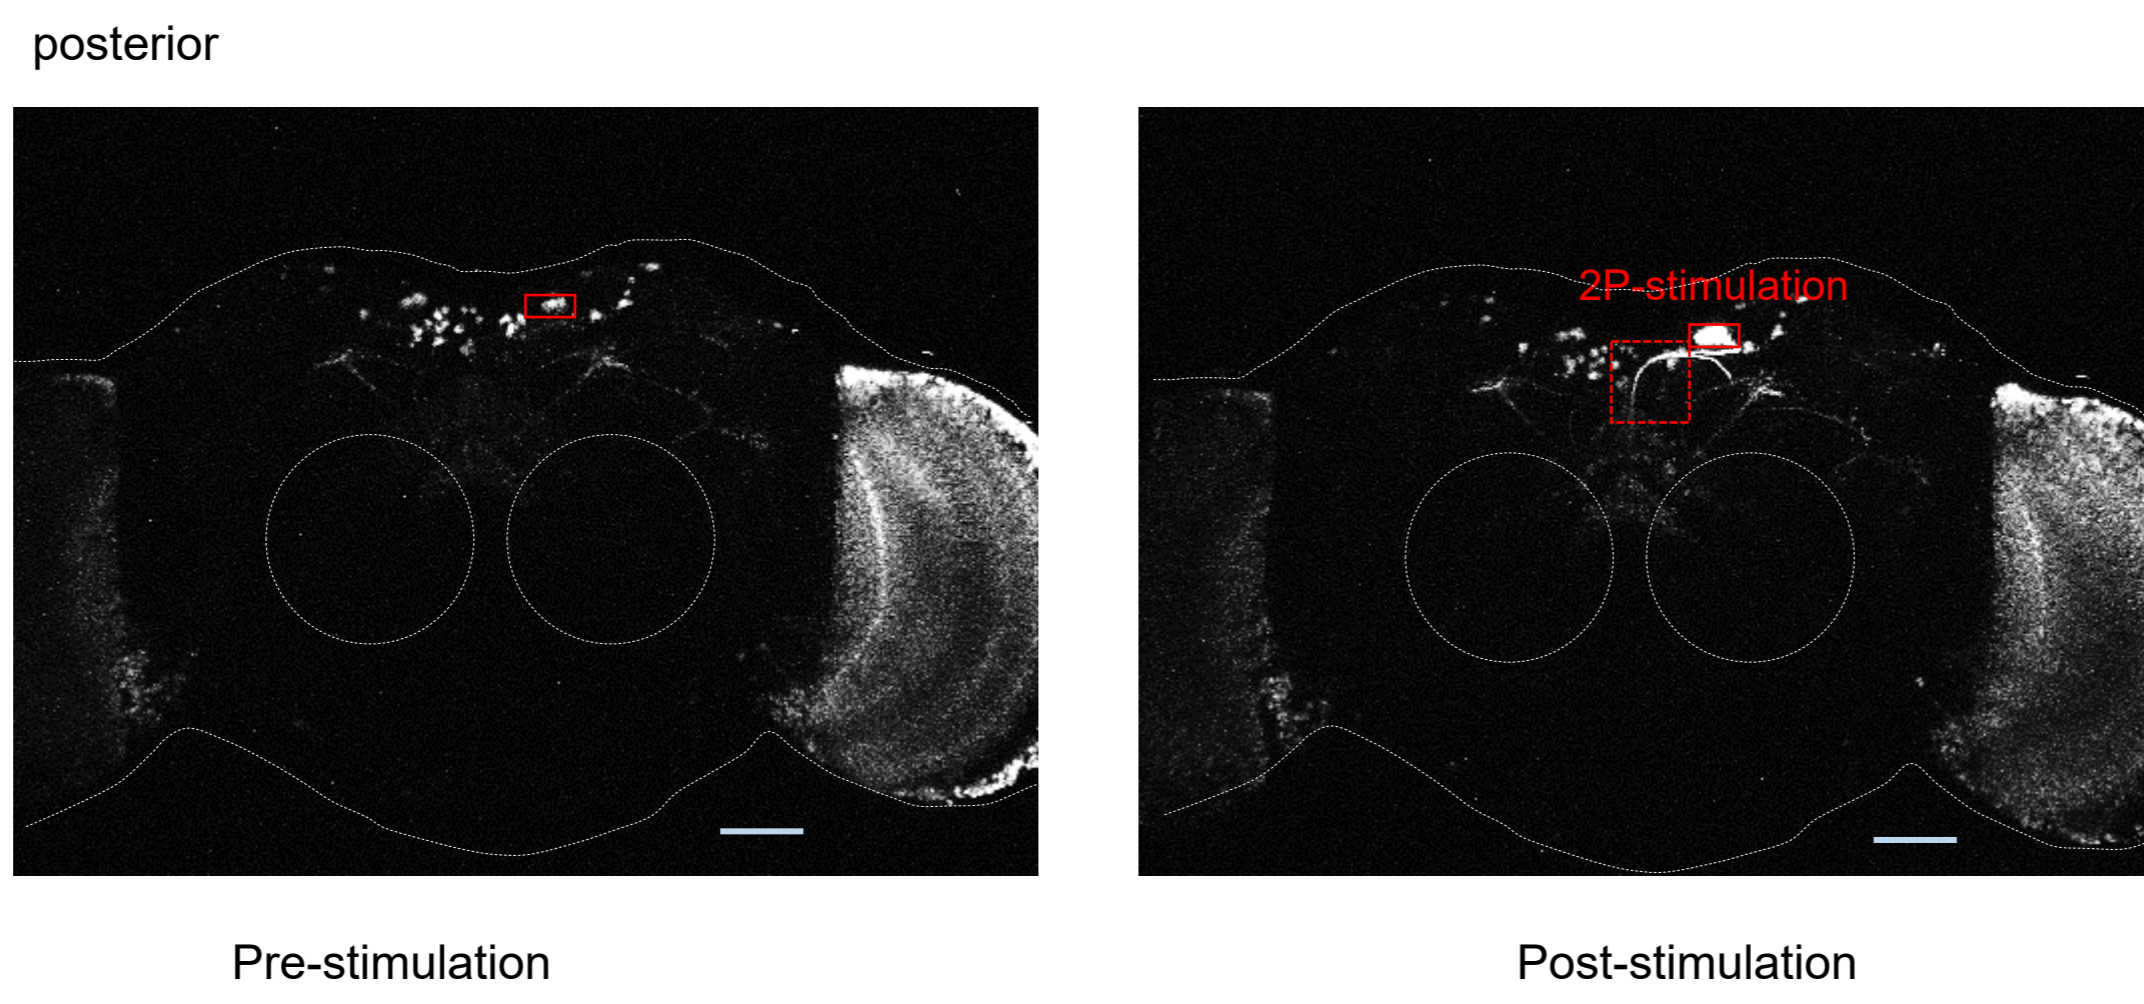

**Fig. S5 SMP DTK<sup>+</sup> neurons send their neurites to the PI region.** After the stimulation of the cell bodies of SMP DTK<sup>+</sup> neurons expressing PA-GFP (left), their neurites could be visualized extending to the PI region (right). Scale bars, 10  $\mu$ m.
