# Supplementary material for: A novel satiety sensor detects circulating glucose and suppresses food consumption via insulin-producing cells in Drosophila
Source: PubMed Central journal article supplement (PMC8089096; doi:10.1038/s41422-020-00449-7), 2020-12-03
Supplement: 41422_2020_449_MOESM6_ESM.pdf [file 41422_2020_449_MOESM6_ESM.pdf]

Fig S6

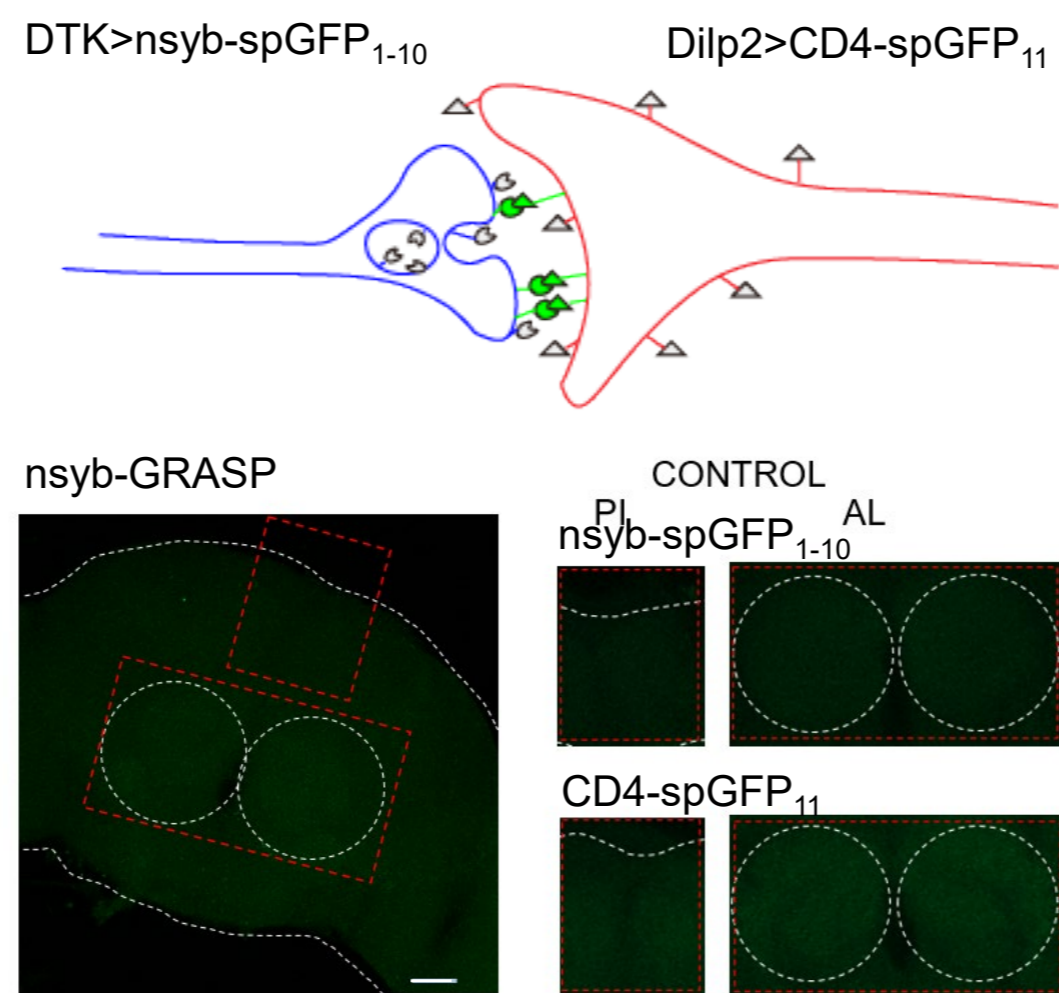

**Fig. S6 DTK<sup>+</sup> neurons and IPCs do not have direct synaptic connections.** Schematic diagram of nSyb-GRASP between DTK<sup>+</sup> and IPCs (top). The absence of nSyb-GRASP signals between DTK<sup>+</sup> neurons and IPCs in the PI region and the AL region (red boxes) (left). In the control groups lacking either of the nSyb-GRASP component, no nSyb-GRASP signal was seen (right). Scale bar, 10  $\mu$ m.
