# Supplementary material for: A novel satiety sensor detects circulating glucose and suppresses food consumption via insulin-producing cells in Drosophila
Source: PubMed Central journal article supplement (PMC8089096; doi:10.1038/s41422-020-00449-7), 2020-12-03
Supplement: 41422_2020_449_MOESM7_ESM.pdf [file 41422_2020_449_MOESM7_ESM.pdf]

Fig S7

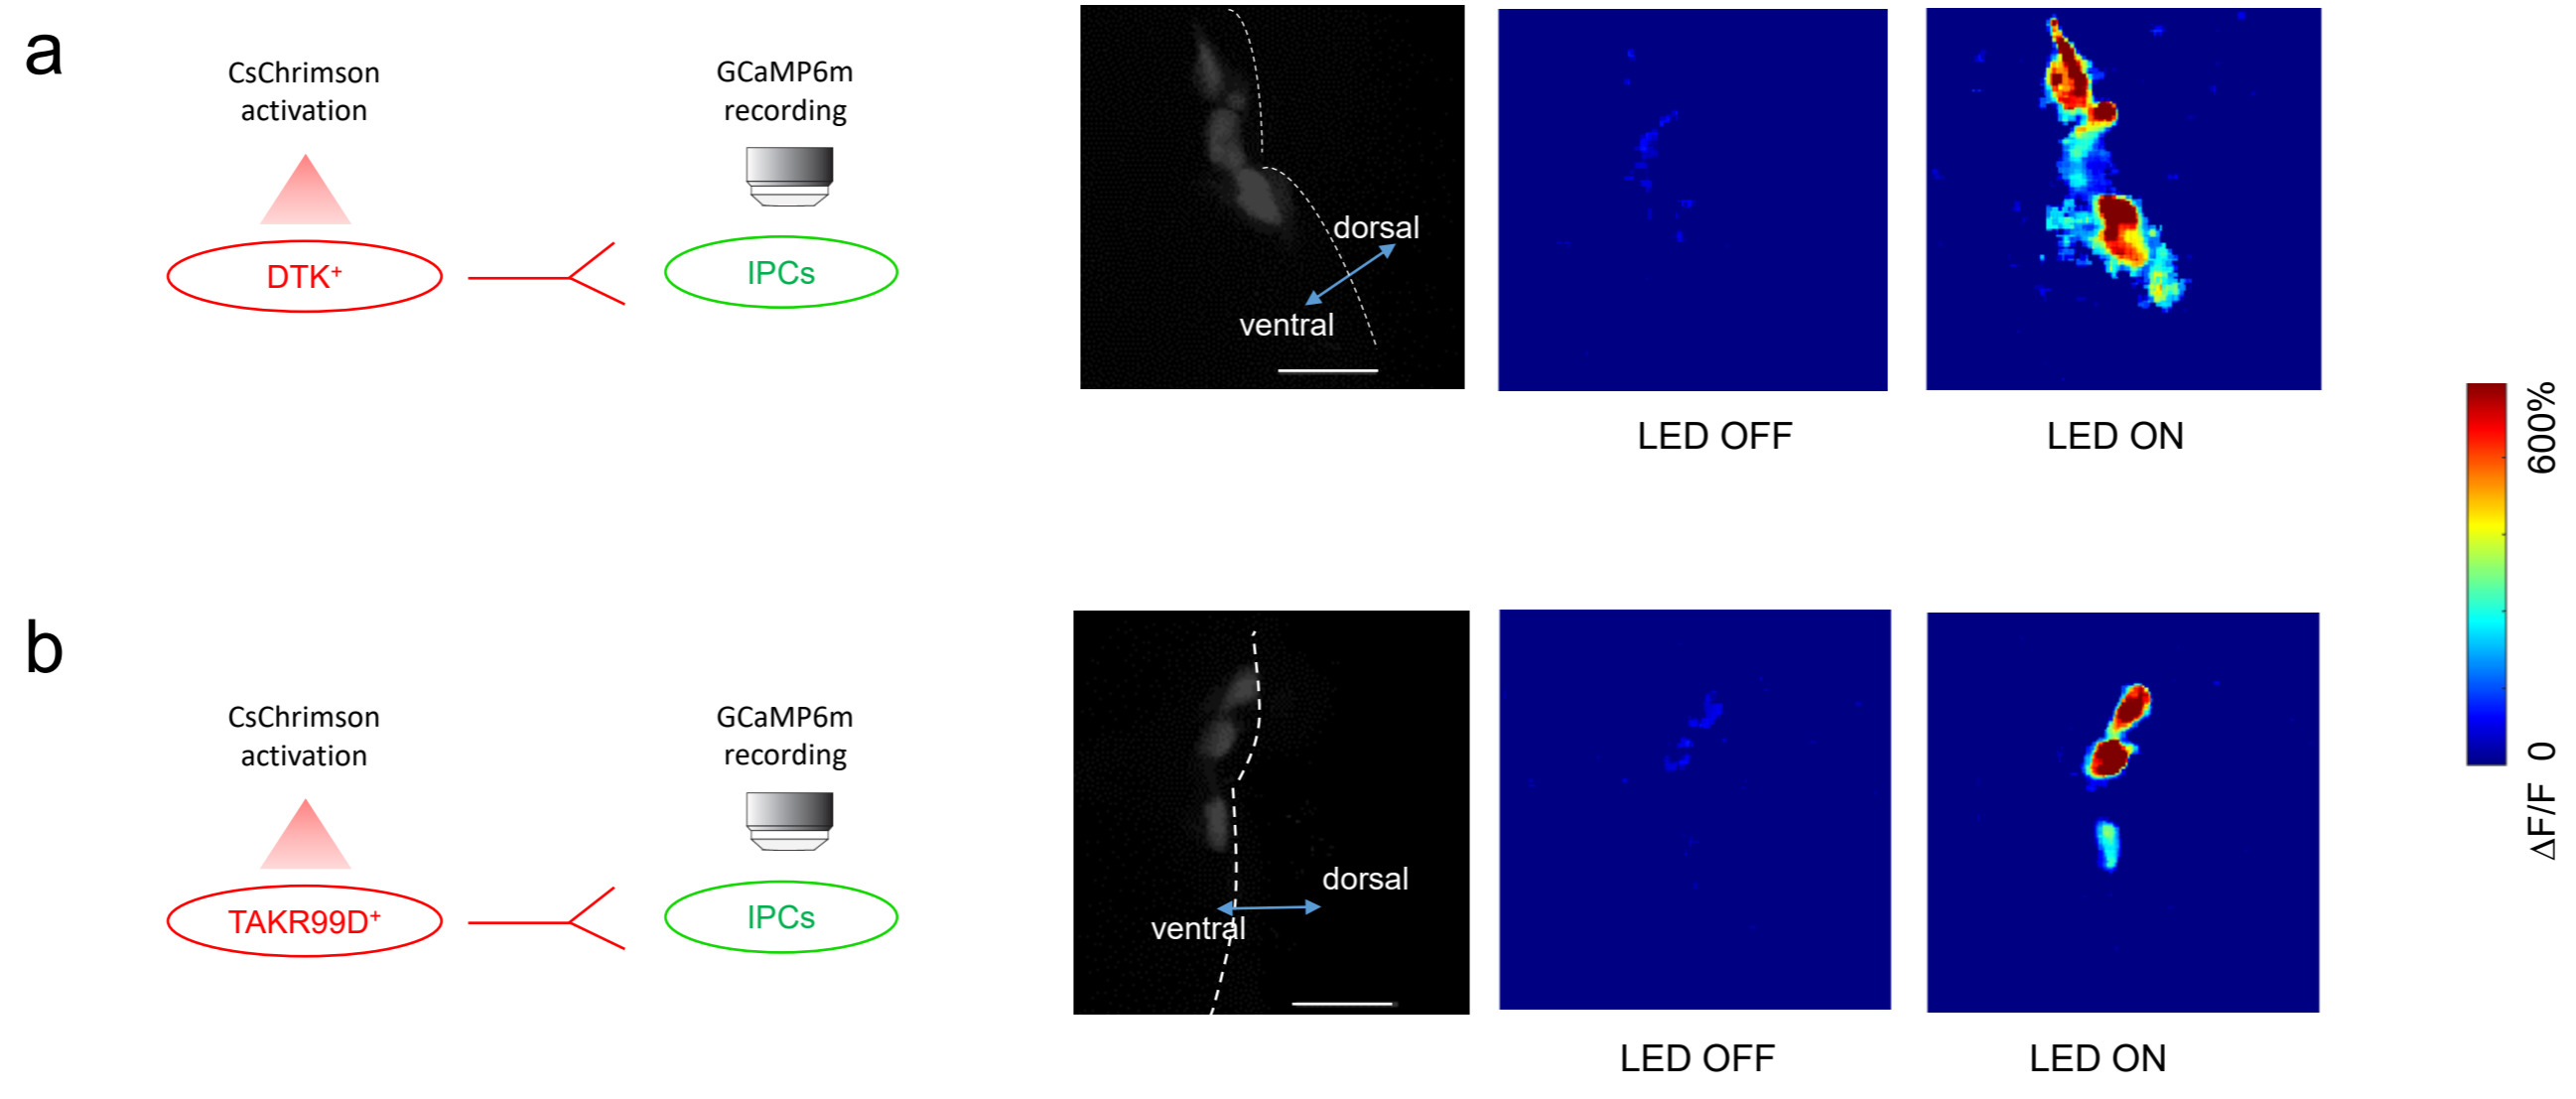

**Fig. S7 IPCs can be activated by the activation of DTK<sup>+</sup> and TAKR99D<sup>+</sup> neurons.**

**a** In the *ex vivo* calcium imaging preparations, the opto-activation of DTK<sup>+</sup> neurons elicited robust calcium responses in IPCs. **b** In the *ex vivo* calcium imaging preparations, the opto-activation of TAKR99D<sup>+</sup> neurons elicited robust calcium responses in IPCs.
