# Supplementary material for: A novel satiety sensor detects circulating glucose and suppresses food consumption via insulin-producing cells in Drosophila
Source: PubMed Central journal article supplement (PMC8089096; doi:10.1038/s41422-020-00449-7), 2020-12-03
Supplement: 41422_2020_449_MOESM8_ESM.pdf [file 41422_2020_449_MOESM8_ESM.pdf]

Fig S8

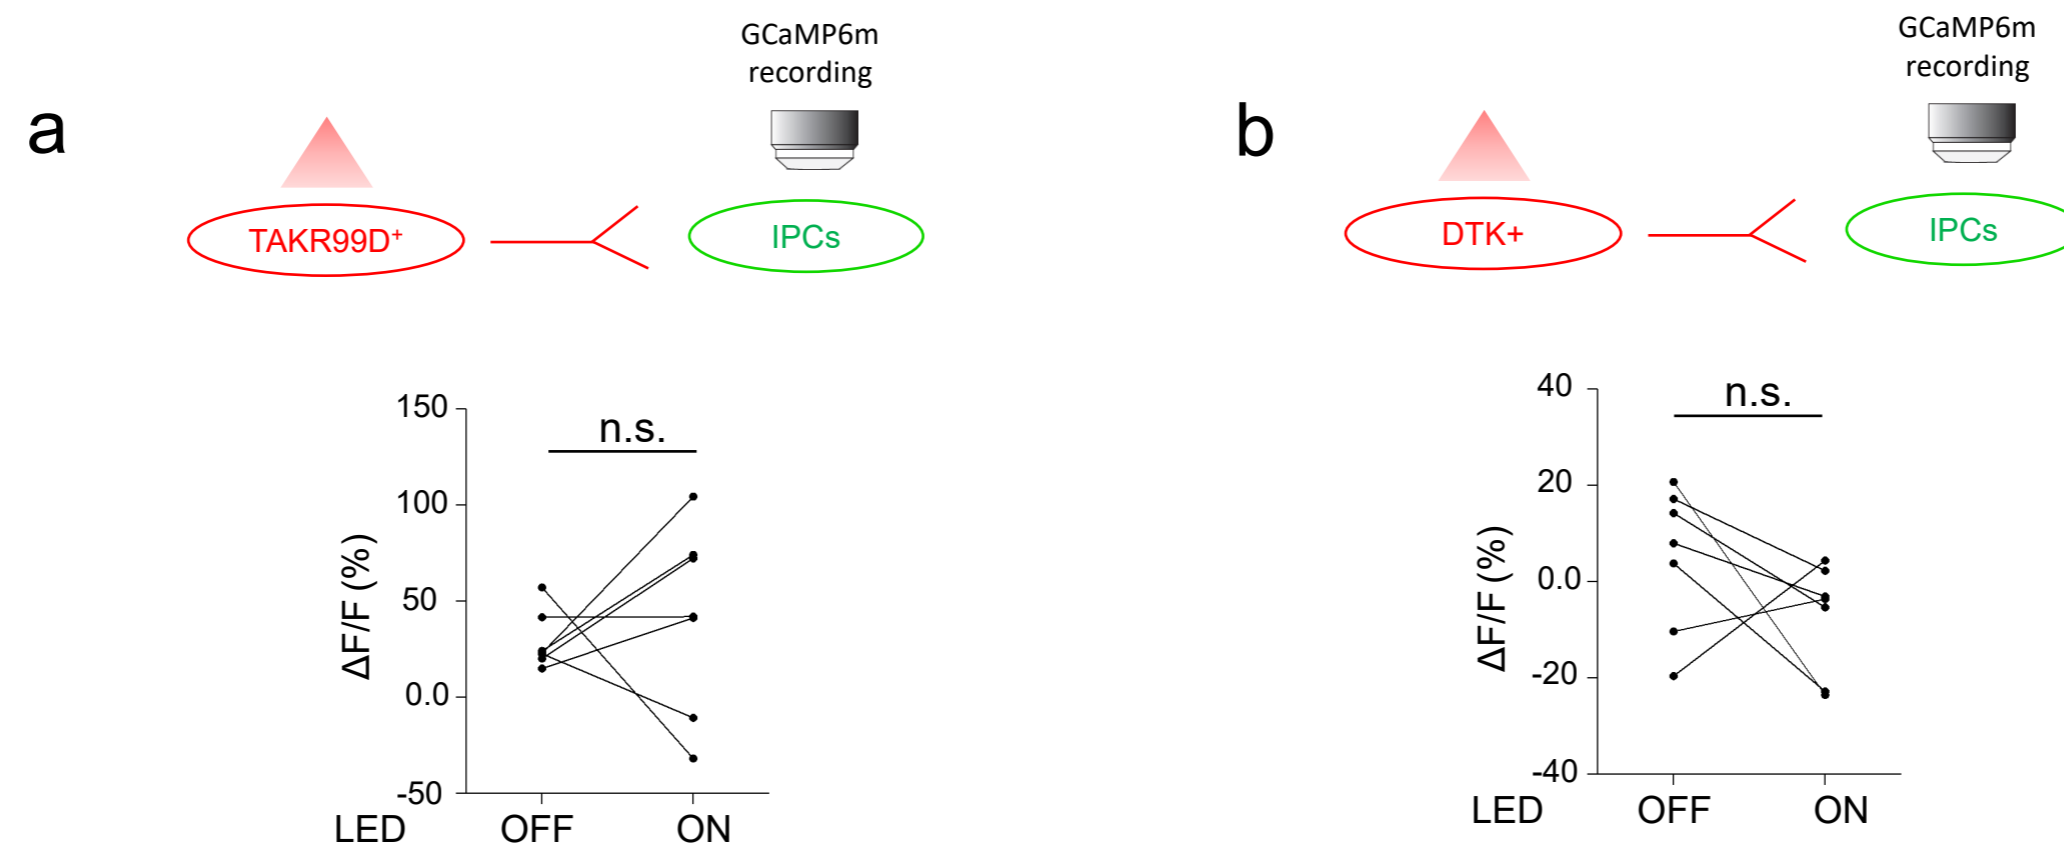

**Fig. S8 Without CsChrimson, red light stimulation does not elicit calcium responses in IPCs.** Quantification of the calcium responses of IPCs upon the red light stimulation without CsChrimson expression in TAKR99D<sup>+</sup> (**a**) and DTK<sup>+</sup> (**b**) neurons ( $n = 6-7$ ). ns,  $P > 0.05$ .
