# Supplementary material for: A novel satiety sensor detects circulating glucose and suppresses food consumption via insulin-producing cells in Drosophila
Source: PubMed Central journal article supplement (PMC8089096; doi:10.1038/s41422-020-00449-7), 2020-12-03
Supplement: 41422_2020_449_MOESM9_ESM.pdf [file 41422_2020_449_MOESM9_ESM.pdf]

Fig S9

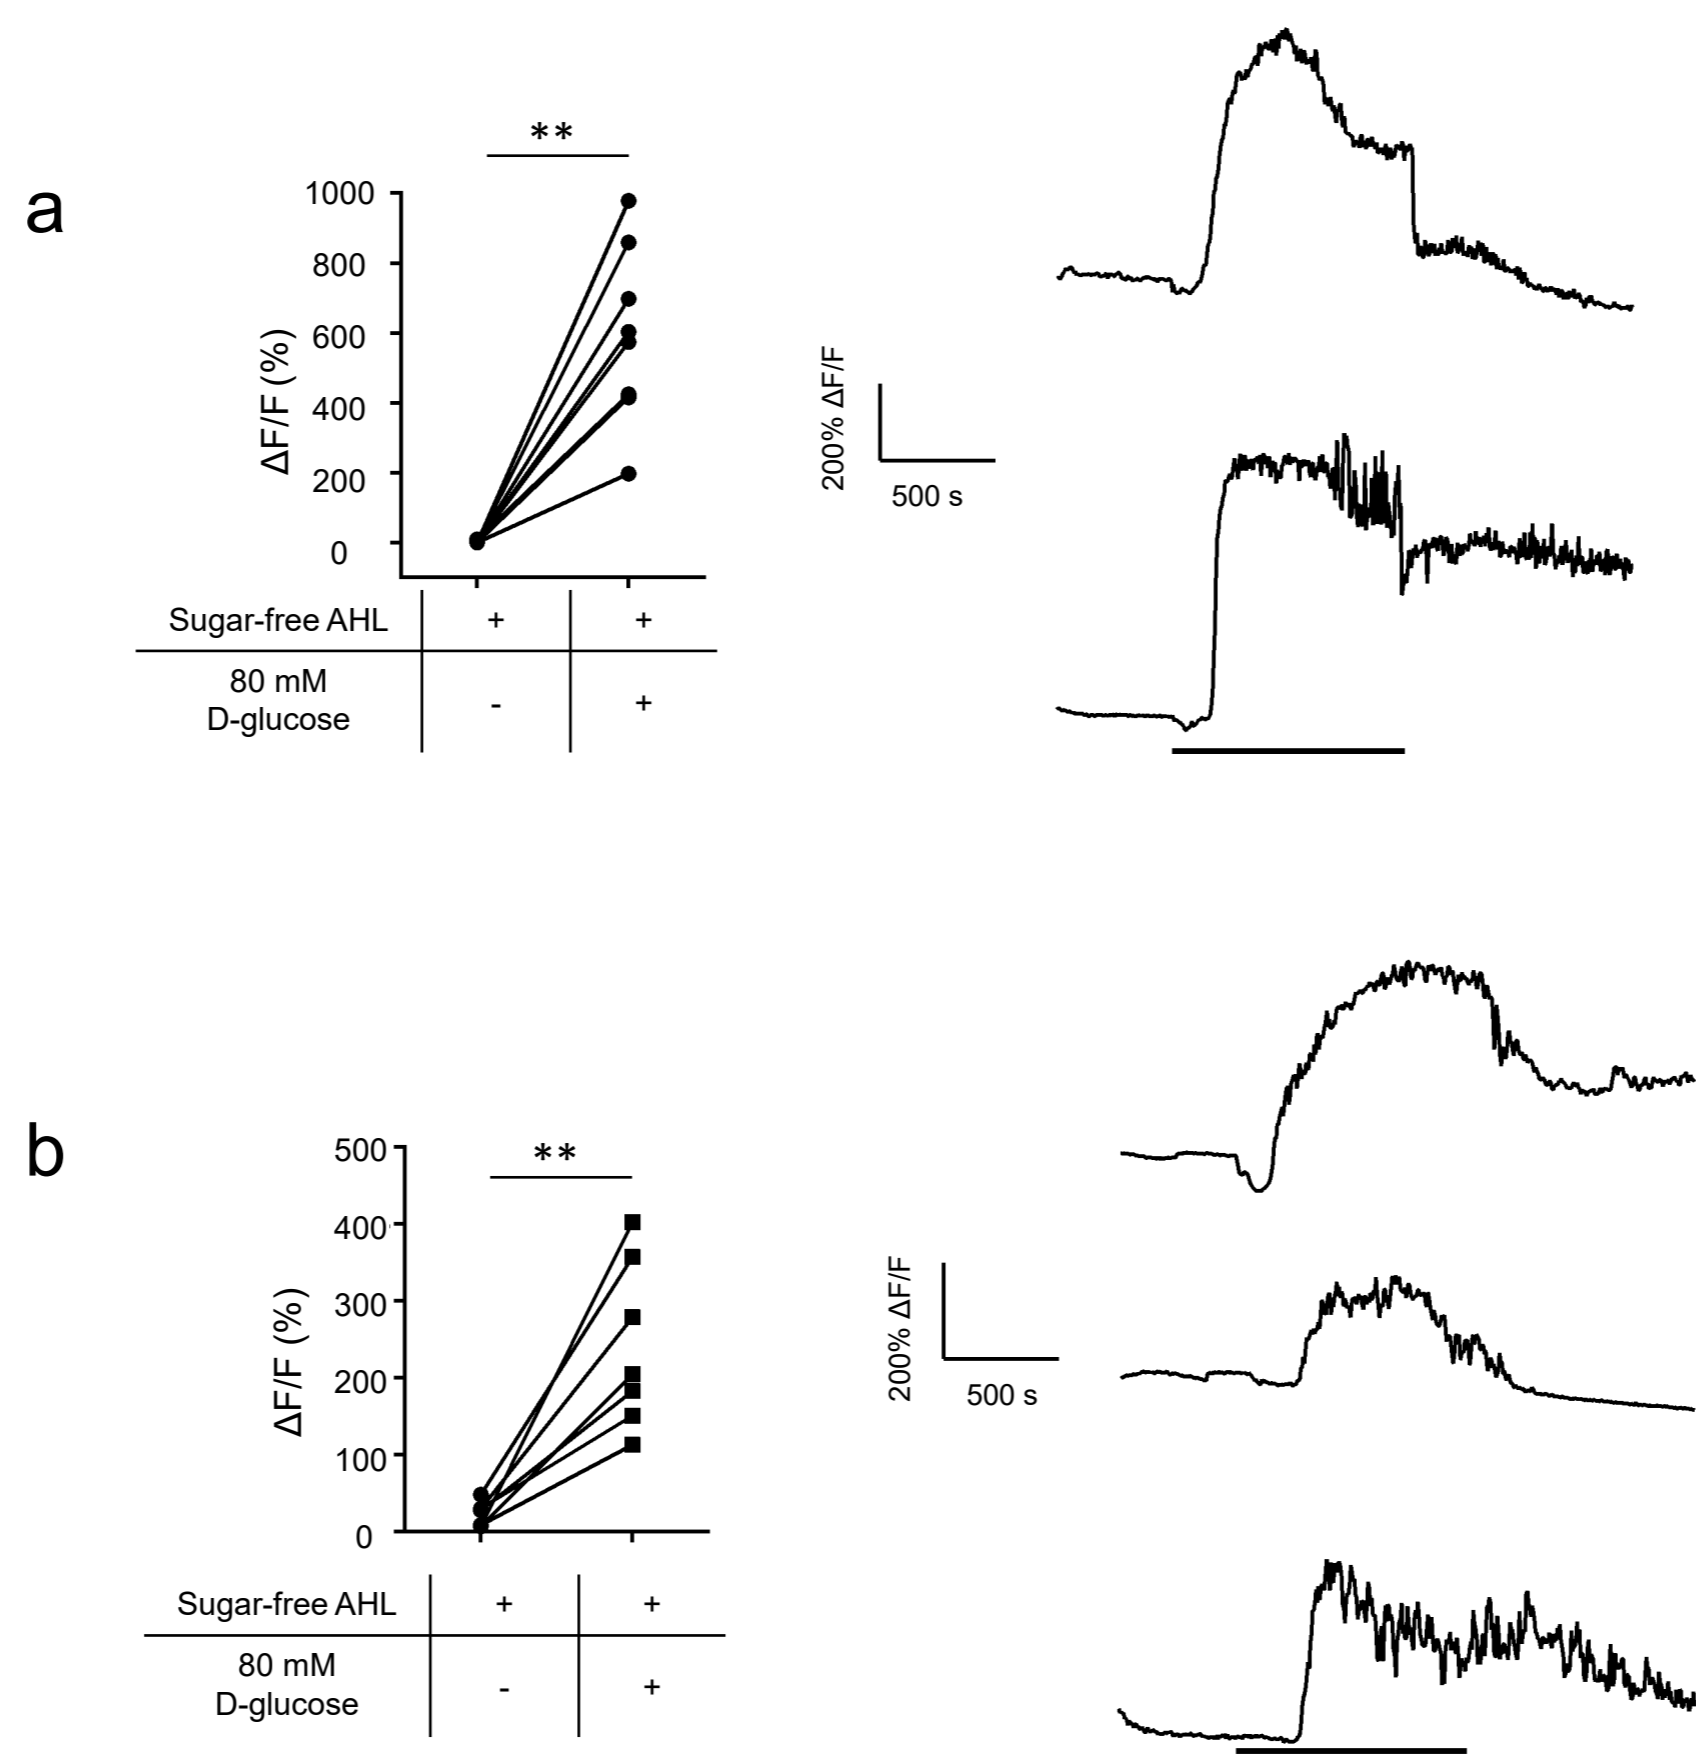

**Fig. S9 Calcium responses in TAKR99D<sup>+</sup> neurons and IPCs upon glucose perfusion.** **a** Quantification (left) and representative traces (right) of the calcium responses of TAKR99D<sup>+</sup> neurons to 80 mM D-glucose in the *ex vivo* calcium imaging preparations ( $n = 7$ ). **b** The calcium responses of IPCs to 80 mM D-glucose in the *ex vivo* calcium imaging preparations ( $n = 7$ ). **\*\* $P < 0.01$ .**
