# Supplementary material for: A novel satiety sensor detects circulating glucose and suppresses food consumption via insulin-producing cells in Drosophila
Source: PubMed Central journal article supplement (PMC8089096; doi:10.1038/s41422-020-00449-7), 2020-12-03
Supplement: 41422_2020_449_MOESM10_ESM.pdf [file 41422_2020_449_MOESM10_ESM.pdf]

Fig S10

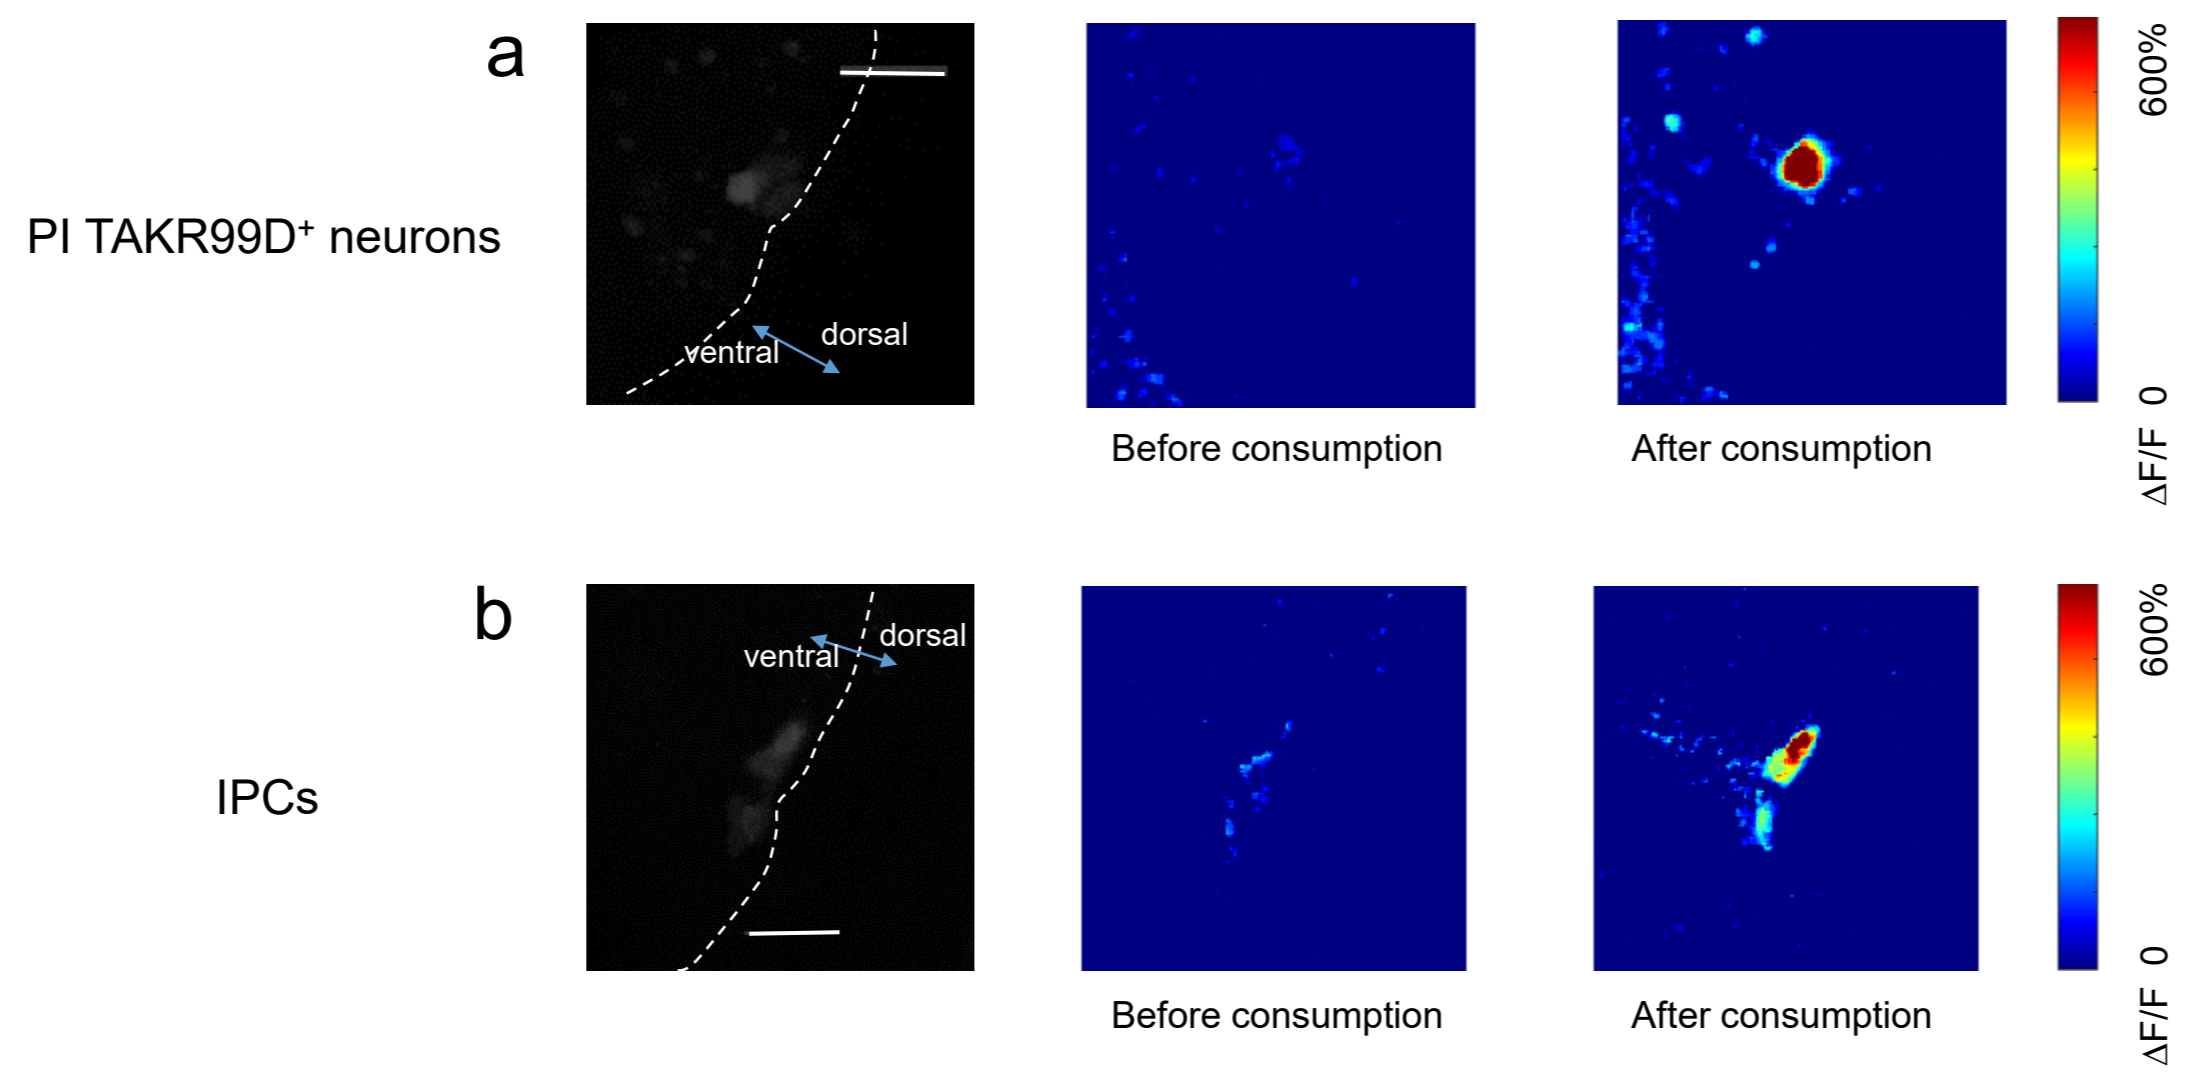

**Fig. S10 Calcium responses in TAKR99D<sup>+</sup> neurons and IPCs upon food ingestion.**

**a** The calcium responses of PI TAKR99D<sup>+</sup> neurons to the ingestion of D-glucose in the *in vivo* calcium imaging preparations ( $n = 10$ ). **b** The calcium responses of IPCs to the ingestion of D-glucose in the *in vivo* calcium imaging preparations ( $n = 12$ ).
