# Supplementary material for: A novel satiety sensor detects circulating glucose and suppresses food consumption via insulin-producing cells in Drosophila
Source: PubMed Central journal article supplement (PMC8089096; doi:10.1038/s41422-020-00449-7), 2020-12-03
Supplement: 41422_2020_449_MOESM11_ESM.pdf [file 41422_2020_449_MOESM11_ESM.pdf]

Fig S11

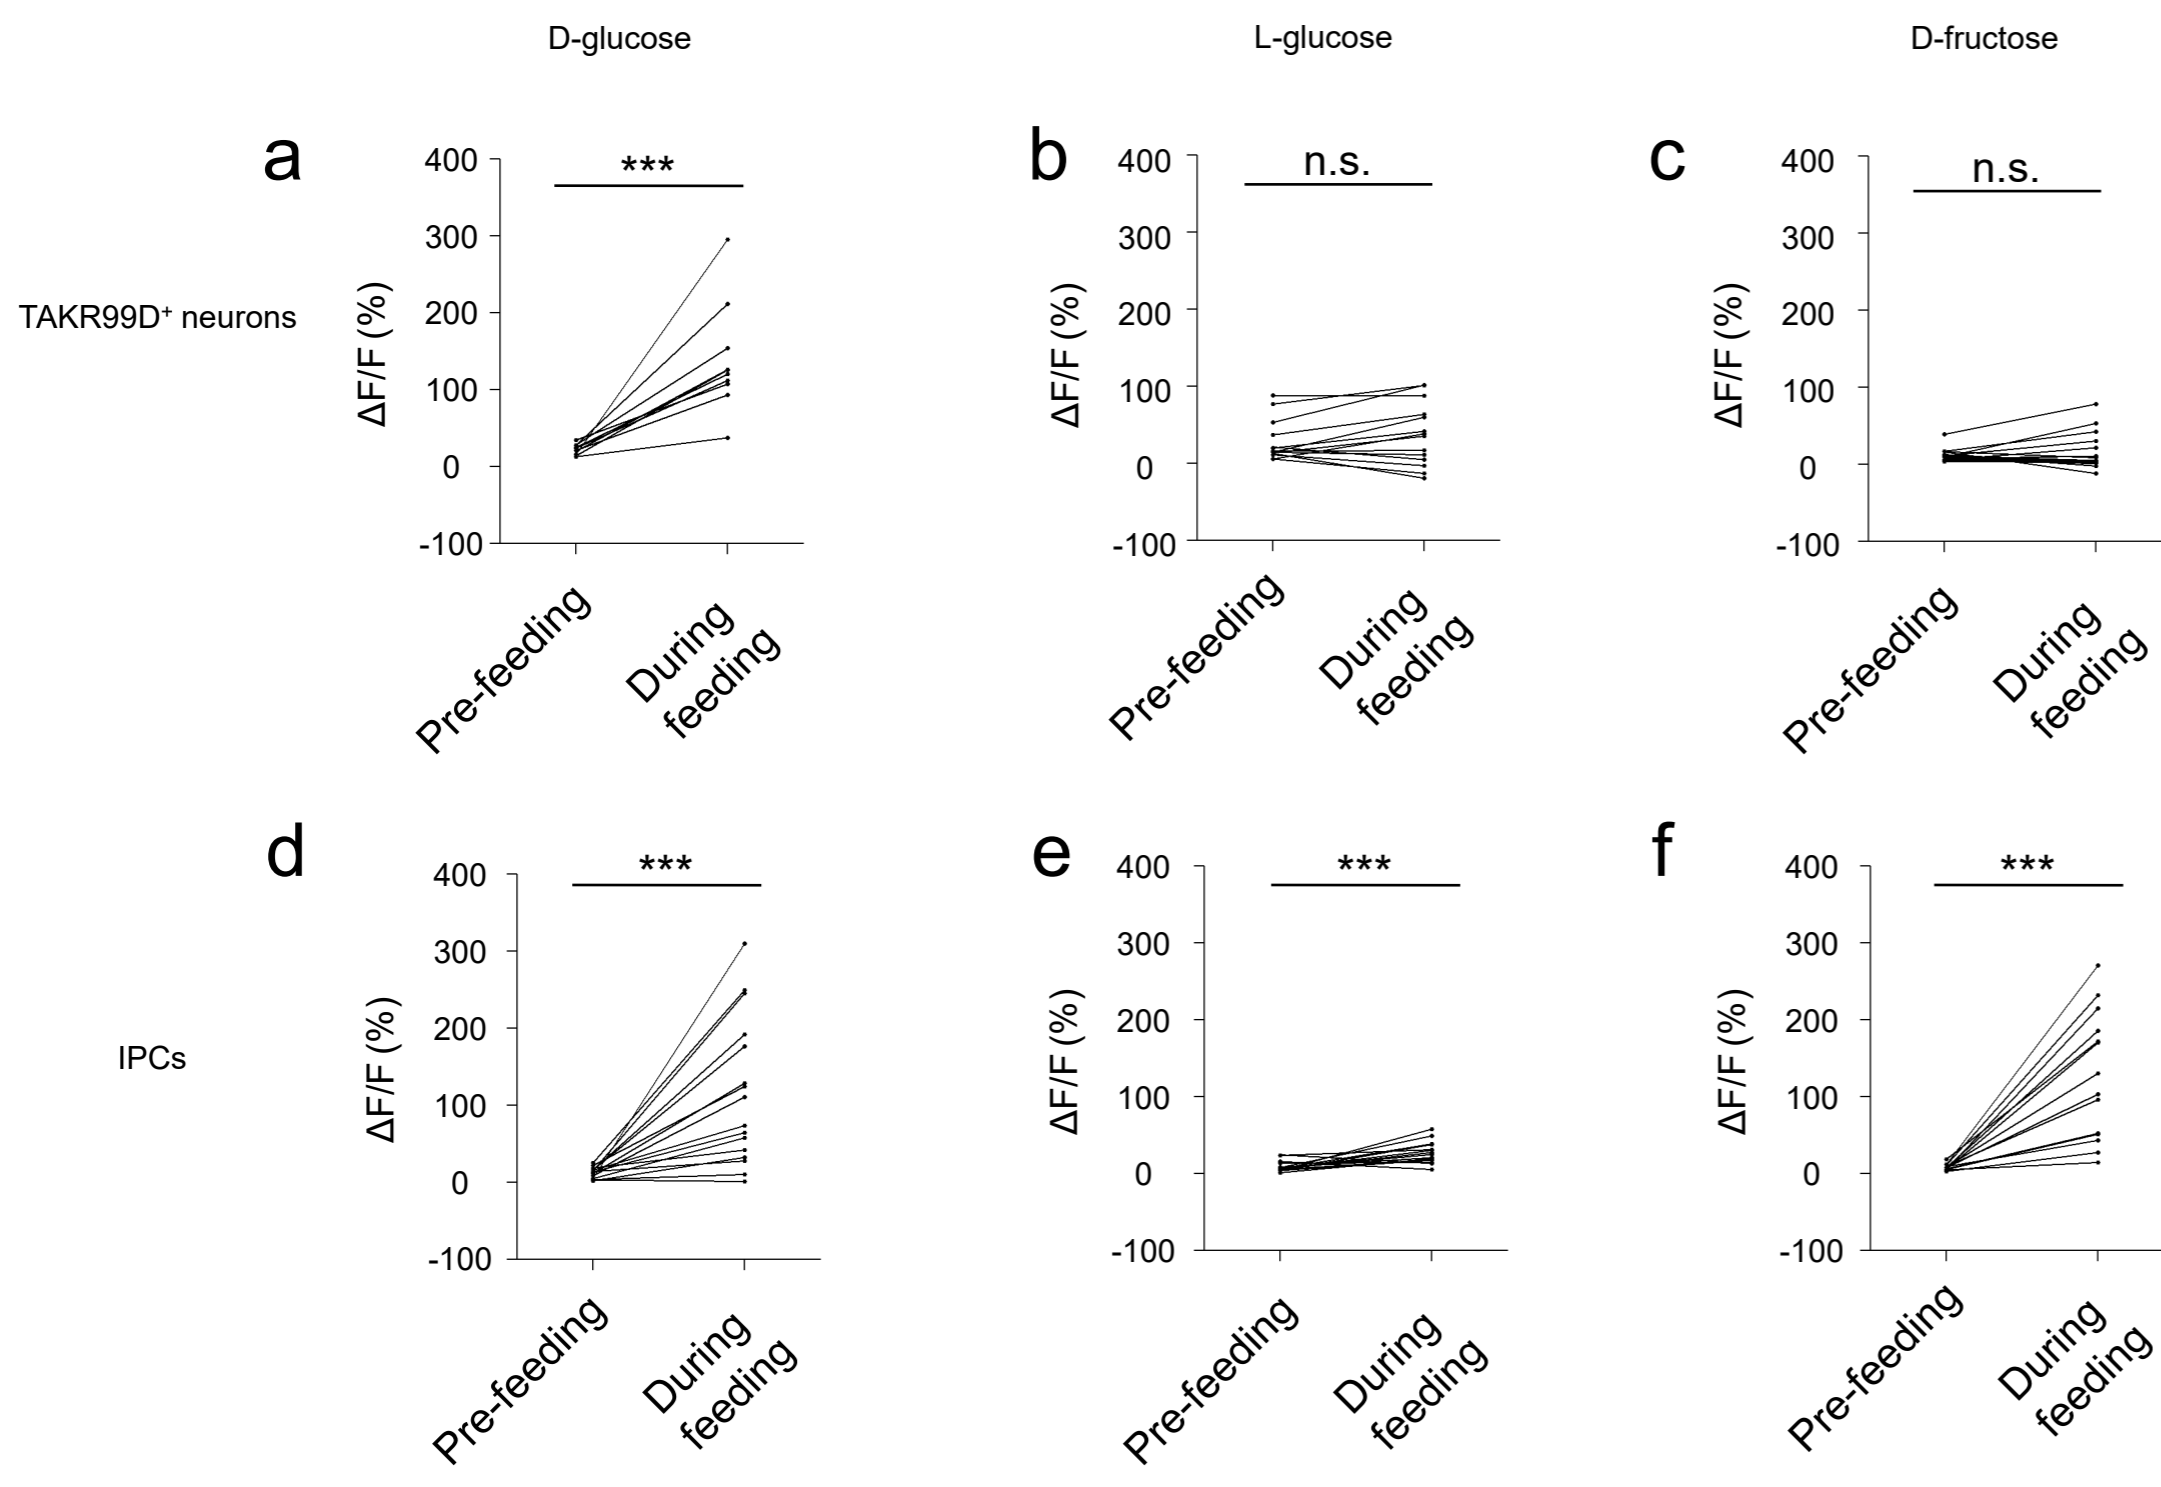

**Fig. S11 Quantification of calcium responses in TAKR99D<sup>+</sup> neurons and IPCs upon food ingestion. a-c** Quantification of the calcium responses of PI TAKR99D<sup>+</sup> neurons upon the ingestion of D-glucose (**a**), L-glucose (**b**), and D-fructose (**c**) ( $n = 10-16$ ). **d-f** Quantification of the calcium responses of IPCs upon the ingestion of D-glucose (**d**), L-glucose (**e**), and D-fructose (**f**) ( $n = 15-16$ ).
